# Supplementary material
Source: PubMed Central journal article supplement (PMC1693798)

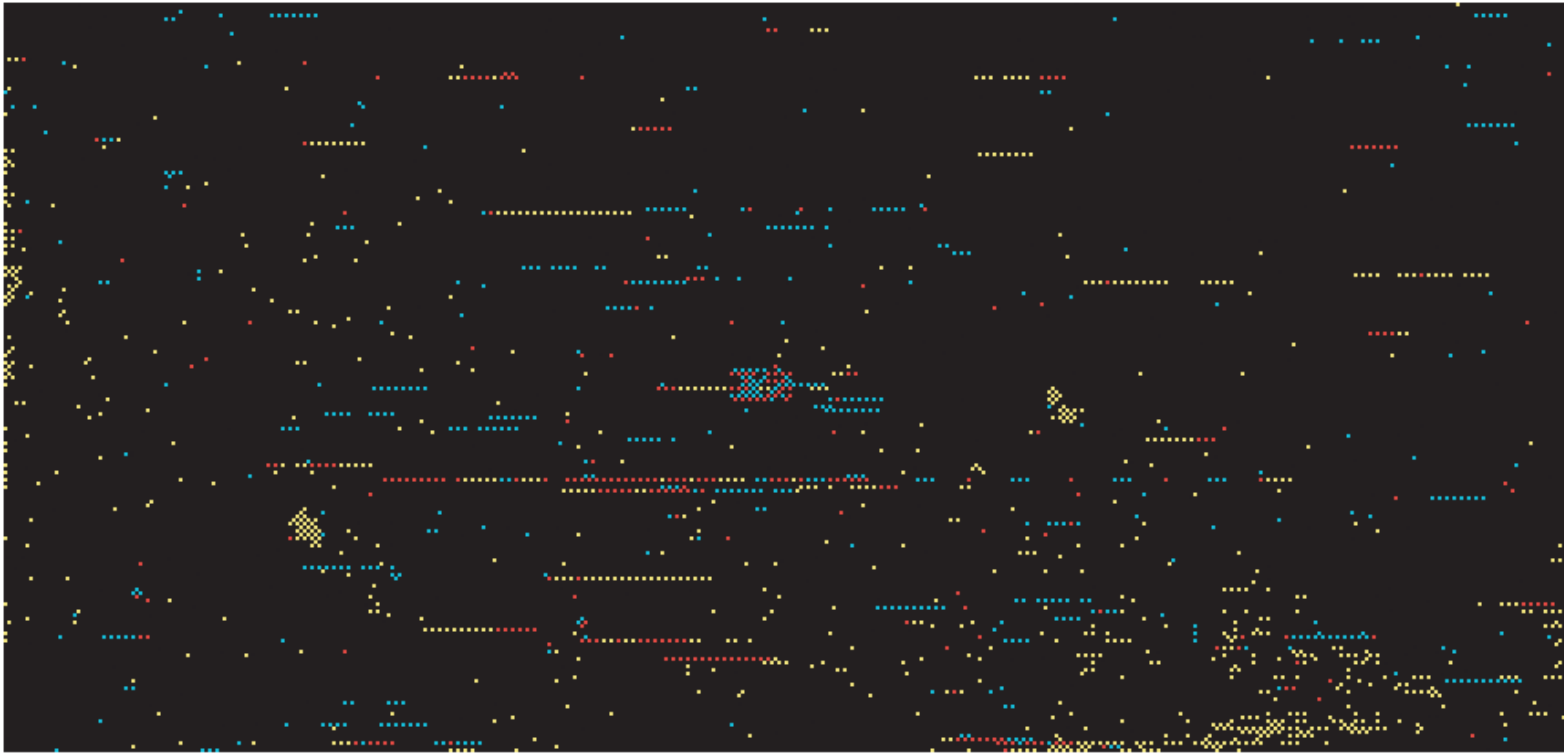

Supplement: pnas_0605450103_1.pdf [file pnas_0605450103_1.pdf]

*tau*

269-371 1-78

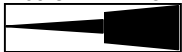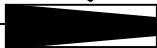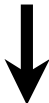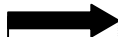

796576

796899

797088

797178

797249

*YLRdelta20*

*TE(UUC)L*

384/387

105/105

Supplement: pnas_0605450103_2.pdf [file pnas_0605450103_2.pdf]

a

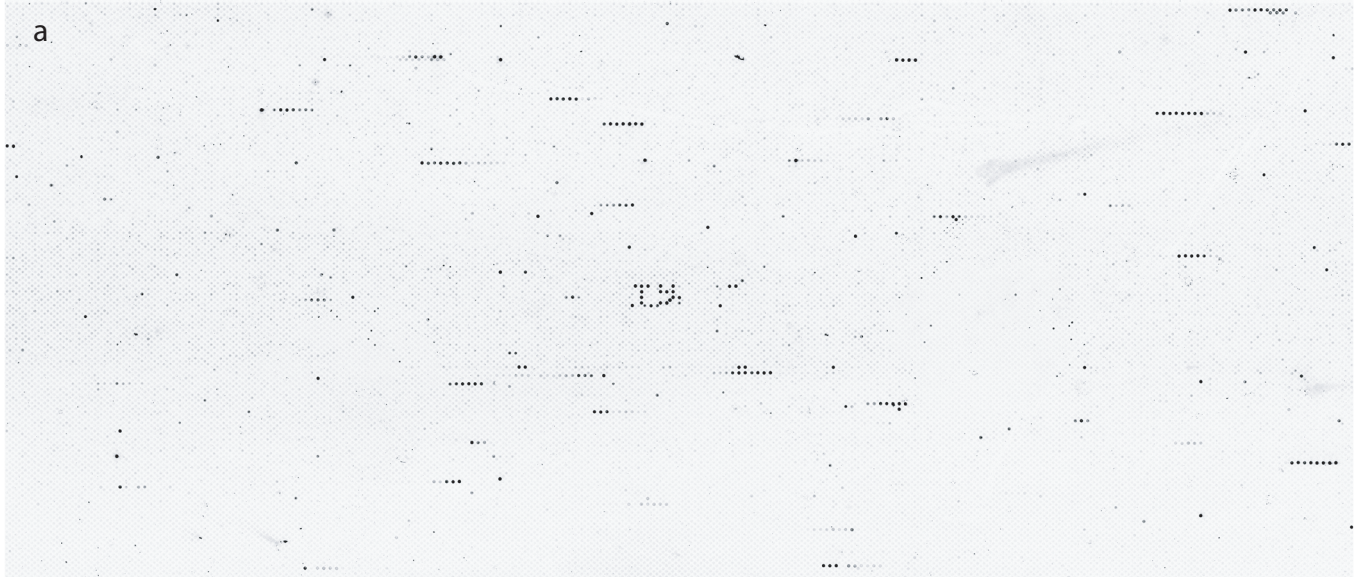

b

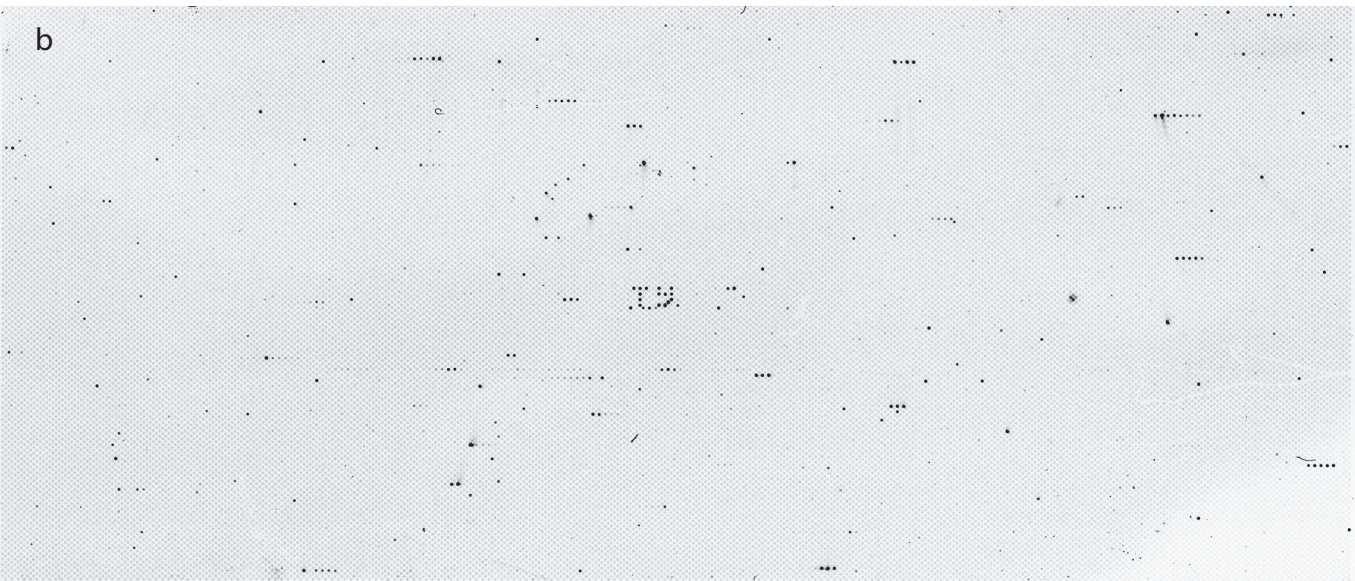

Supplement: pnas_0605450103_3.pdf [file pnas_0605450103_3.pdf]
